# Supplementary material
Source: publisher site journal article supplement (https://www.dovepress.com/article/330493)
Supplement: Supplementary file 1 [file get_supplementary_file.php]

A、Supplementary methods

- 1. GC-TOF-MS

（1）Metabolites Extraction

Transfer 100 μL sample to EP tube and 400 μL pre-cold extraction mixture (methanol/acetonitrile (v:v) =1:1) with with 10 μL internal standard (adonitol, 0.5mg/mL stock)were added, vortex mixing for 30 s.

Ultrasound for 10 min (ice bath) .Centrifuge the samples at 4 ℃ and 12000 rpm for 15 min. Carefully transfer the 180 μL supernatant into a 1.5 mL EP tube. Take 50 μL of each sample and mix them into QC samples. Dry extract in vacuum concentrator.

After evaporation in a vacuum concentrator, 30 μLof Methoxyamination hydrochloride (20mg/mL in pyridine) was added and then incubated at 80 ℃ for 30 min, then derivatized by 40 μL of BSTFA regent (1% TMCS, v/v) at 70 ℃ for 1.5 h. Gradually cooling samples to room temperature, 5 μL of FAMEs (in chloroform) was added to QC sample. All samples were then analyzed by gas chromatograph coupled with a time-of-flight mass spectrometer (GC-TOF-MS).

1. Analysis

GC-TOF-MS analysis was performed using an Agilent 7890 gas chromatograph coupled with a time-of-flight mass spectrometer. The system utilized a DB-5MS capillary column. 1 μL aliquot of sample was injected in splitless mode. Helium was used as the carrier gas, the front inlet purge flow was 3 mL min−1, and the gas flow rate through the column was 1 mL min−1. The initial temperature was kept at 50 °C for 1 min, then raised to 310 °C at a rate of 20 °C min−1, then kept for 6 min at 310 °C. The injection, transfer line, and ion source temperatures were 280, 280and 250 °C, respectively. The energy was -70 eV in electron impact mode. The mass spectrometry data were acquired in full-scan mode with the m/z range of 50-500 at a rate of 12.5 spectra per second after a solvent delay of 4.9 min.

1.2UHPLC-QE-MS

（1）Metabolites Extraction

100 μL of sample was transferred to an EP tube. After the addition of 400 μL of extract solution (acetonitrile: methanol = 1: 1, containing isotopically-labelled internal standard mixture), the samples were vortexed for 30 s, sonicated for 10 min in ice-water bath, and incubated for 1 h at -40 ℃ to precipitate proteins. Then the sample was centrifuged at 12000 rpm for 15 min at 4 ℃. The resulting supernatant was transferred to a fresh glass vial for analysis. The quality control (QC) sample was prepared by mixing an equal aliquot of the supernatants from all of the samples.

（2）Analysis

LC-MS/MS analyses were performed using an UHPLC system (Vanquish, Thermo Fisher Scientific) with a UPLC BEH Amide column (2.1 mm × 100 mm, 1.7 μm) coupled to Q Exactive HFX mass spectrometer (Orbitrap MS, Thermo). The mobile phase consisted of 25 mmol/L ammonium acetate and 25 ammonia hydroxide in water（pH = 9.75）(A) and acetonitrile (B). The analysis was carried with elution gradient as follows: 0~0.5 min, 95%B; 0.5~7.0 min, 95%~65% B; 7.0~8.0 min, 65%~40% B; 8.0~9.0 min, 40% B; 9.0~9.1 min, 40%~95% B; 9.1~12.0 min, 95% B. The column temperature was 30 ℃. The auto-sampler temperature was 4 ℃, and the injection volume was 2 μL.

The QE HFX mass spectrometer was used for its ability to acquire MS/MS spectra on information-dependent acquisition (IDA) mode in the control of the acquisition software (Xcalibur, Thermo). In this mode, the acquisition software continuously evaluates the full scan MS spectrum. The ESI source conditions were set as following: sheath gas flow rate as 50 Arb, Aux gas flow rate as 10 Arb, capillary temperature 320 ℃, full MS resolution as 60000, MS/MS resolution as 7500, collision energy as 10/30/60 in NCE mode, spray Voltage as 3.5 kV (positive) or -3.2 kV (negative), respectively.

B、Supplementary figure:


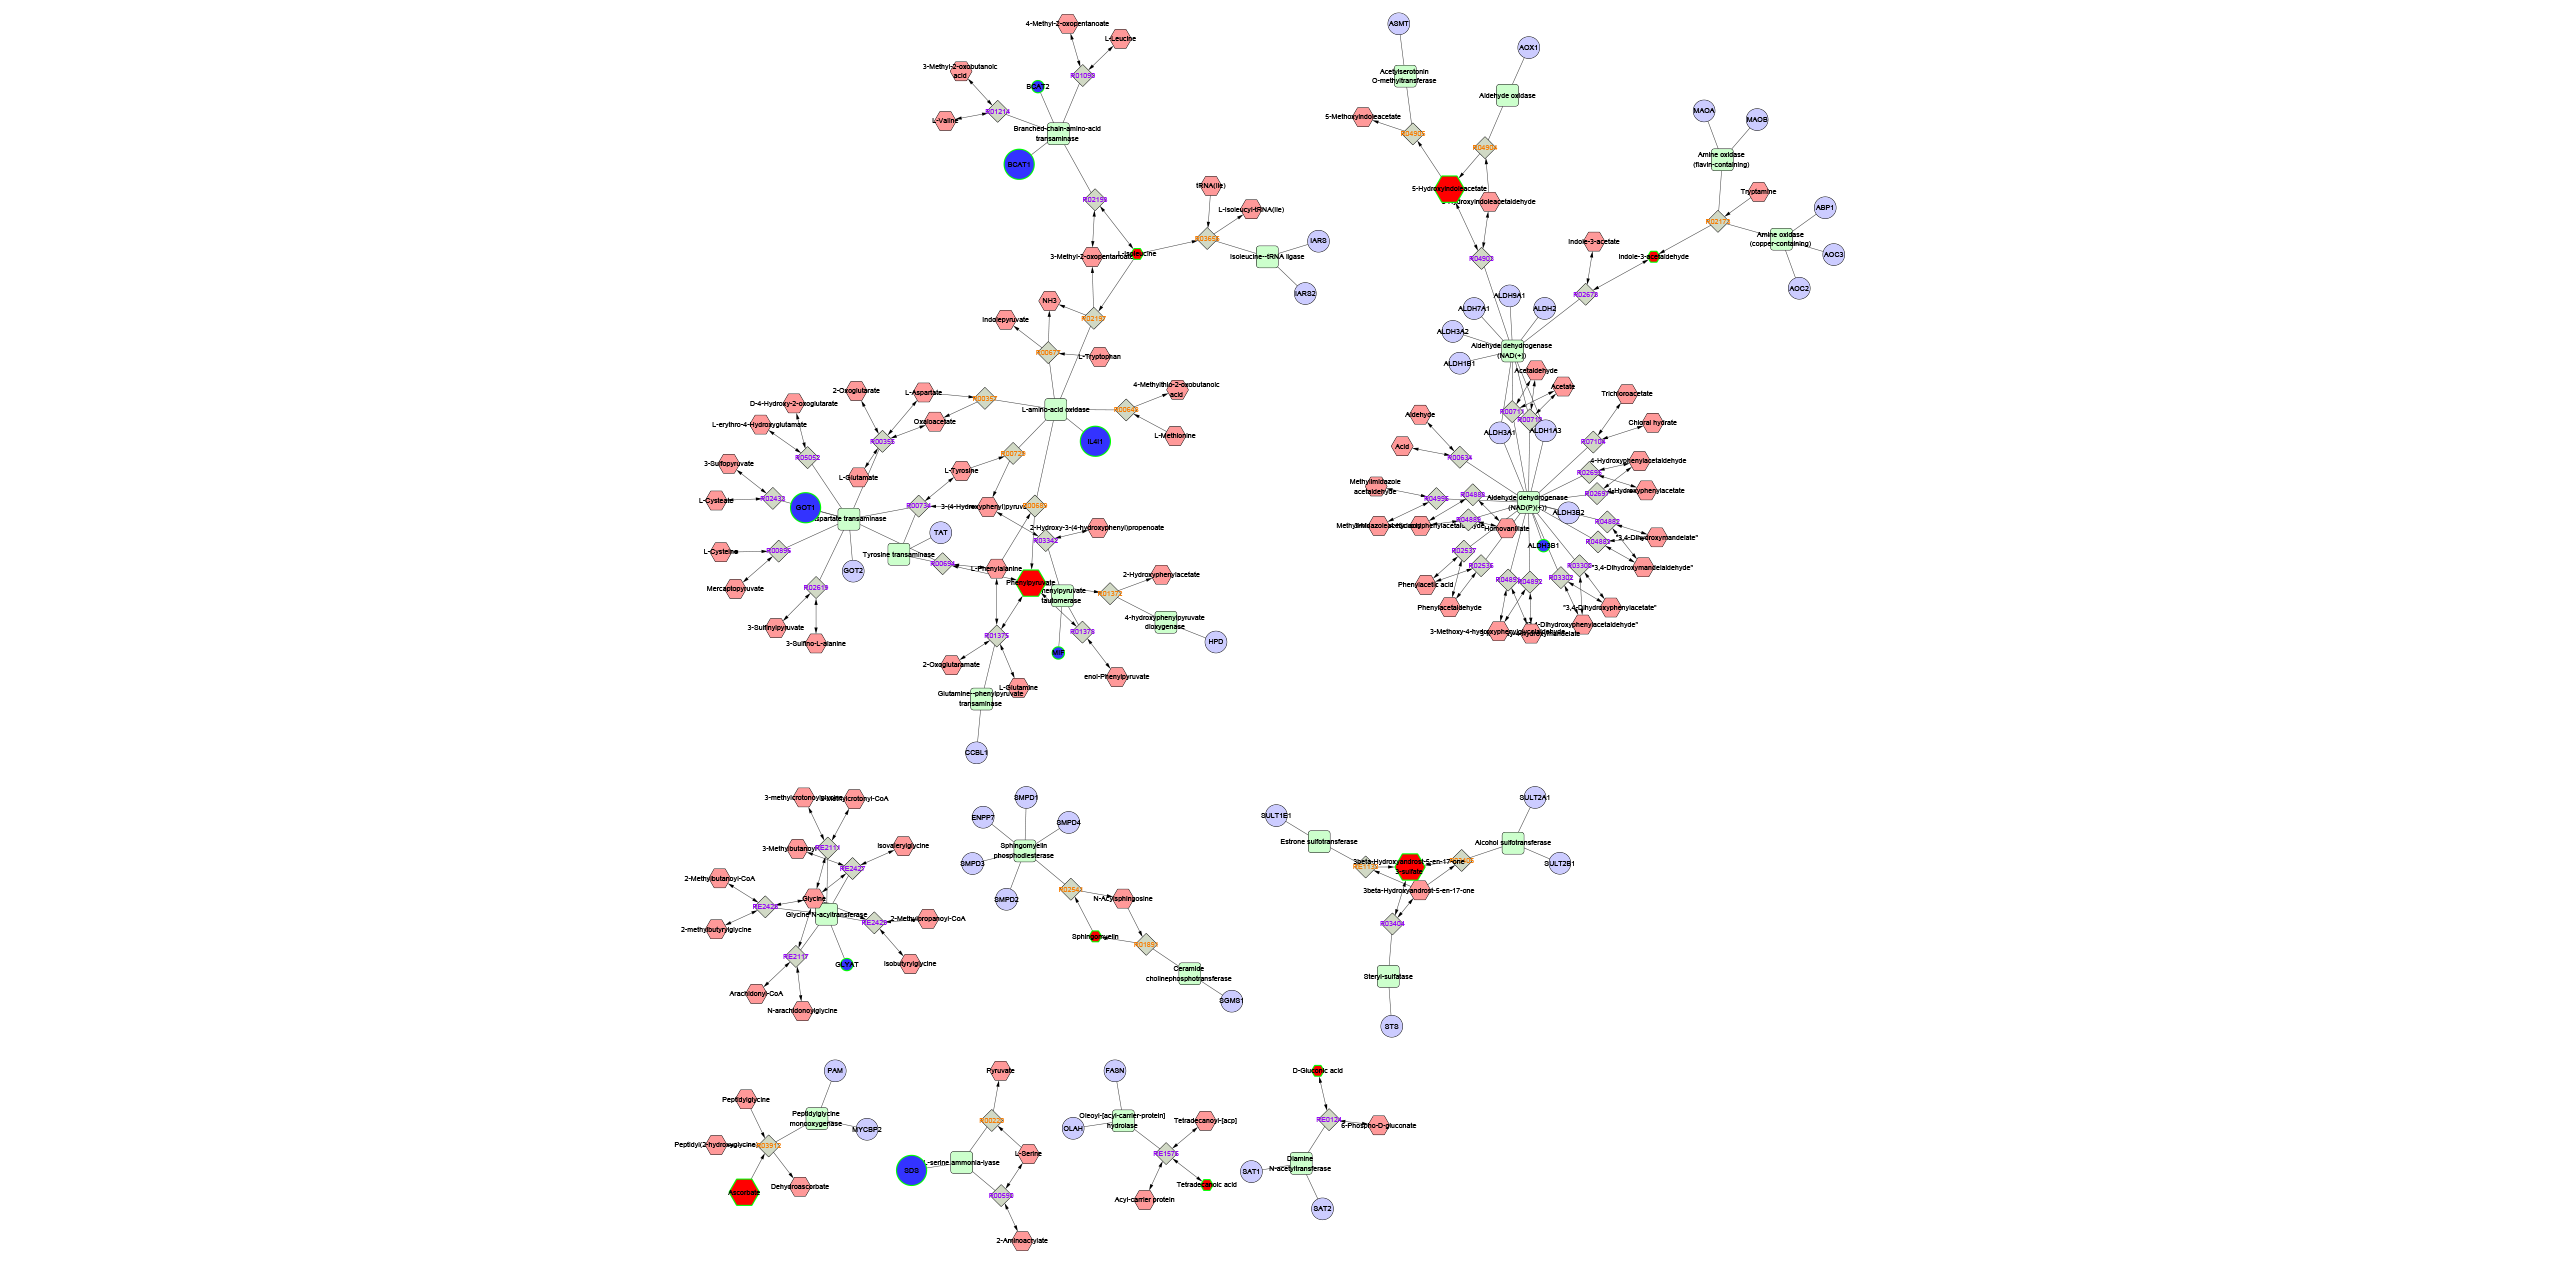


Figure S1 Fully connected network of metabolites and genes in selected 3 pathways. The nodes in red indicated differential metabolites and the nodes in blue indicated differentially expressed genes. The nodes in green indicated enzymes in these pathways.
